# Supplementary material
Source: PubMed Central journal article supplement (PMC6563544)
Supplement: jamaneurol-76-1099-s001.pdf [file jamaneurol-76-1099-s001.pdf]

## Supplementary Online Content

Ma Y, Jun GR, Zhang X, et al; Alzheimer's Disease Sequencing Project and Alzheimer's Disease Exome Sequencing-France Project. Analysis of whole-exome sequencing data for Alzheimer disease stratified by *APOE* genotype. *JAMA Neurol*. Published online June 10, 2019. doi:10.1001/jamaneurol.2019.1456

**eMethods.** Dataset Used for Functional Genomic Analysis

**eTable 1.** Characteristics of the Discovery and Replication Samples

**eTable 2.** Results for SNVs and Indels in the Discovery Sample

**eTable 3.** Meta-analysis Results for SNVs and Indels in the Discovery and Replication Samples

**eTable 4.** Results of Gene-Based Tests in the Discovery and Replication Samples

**eFigure 1.** QQ Plots for Association by Analysis Model and *APOE* Genotype in the Discovery Sample

**eFigure 2.** Manhattan Plots for Association by Analysis Model and *APOE* Genotype in the Discovery Sample

**eFigure 3.** Association of Alzheimer Disease With Variants in the *ISYNA1* Region

**eFigure 4.** Association of Alzheimer Disease With Variants in the *TREM2* Region

**eFigure 5.** Association of Alzheimer Disease With Variants in the *AC099552* Region

**eFigure 6.** Association of Alzheimer Disease With Variants in the *GPAA1* Region

**eFigure 7.** Association of Alzheimer's disease with variants in the region including *MAPT* and *NSF*

**eReferences.**

This supplementary material has been provided by the authors to give readers additional information about their work.

**eMethods. Dataset used for functional genomic analysis.**

The Religious Orders Study (ROS) and the Rush Memory and Aging Project (MAP) enrolled more than 3,322 subjects free of dementia at baseline who have been examined longitudinally until death using a neuropsychological test battery. Their postmortem brains were examined neuropathologically<sup>1,2</sup> and RNA was extracted from the dorsolateral prefrontal cortex (DLPFC) for gene expression analysis<sup>3,4</sup>. DNA from brain tissue, whole blood or lymphocytes transformed with EBV virus was extracted for whole genome sequencing (WGS)<sup>3</sup>. Global cognition function at the last exam before death was calculated as the average of the Z scores for 19 cognitive tests which are described in detail elsewhere<sup>5</sup>. The present study included 1,072 subjects who have WGS and cognition function test data and neuritic plaque and neurofibrillary tangles, and a subset of 432 subjects have RNA sequencing data.

**eTable 1.** Characteristics of the discovery and replication samples.

| Study                         | Genotyping platform     | Total Sample (N) | Percent of <i>APOE</i> E4 positive (%) | <i>APOE</i> ε4+ subjects |       |                        |          |                       | <i>APOE</i> ε4- subjects |       |                        |          |                       |
|-------------------------------|-------------------------|------------------|----------------------------------------|--------------------------|-------|------------------------|----------|-----------------------|--------------------------|-------|------------------------|----------|-----------------------|
|                               |                         |                  |                                        | All (N)                  | Cases |                        | Controls |                       | All (N)                  | Cases |                        | Controls |                       |
|                               |                         |                  |                                        |                          | N     | Age-at-onset (mean±SD) | N        | Age-at-exam (mean±SD) |                          | N     | Age-at-onset (mean±SD) | N        | Age-at-exam (mean±SD) |
| Discovery                     |                         |                  |                                        |                          |       |                        |          |                       |                          |       |                        |          |                       |
| ADSP                          | Whole exome sequencing  | 10,441           | 29.53                                  | 3,083                    | 2,377 | 71.62±7.77             | 706      | 87.36±3.47            | 7,358                    | 3,145 | 79.34±8.83             | 4,213    | 86.39±4.61            |
| Replication                   |                         |                  |                                        |                          |       |                        |          |                       |                          |       |                        |          |                       |
| ADES-FR                       | Whole exome sequencing  | 2,275            | 34.86                                  | 793                      | 555   | 72.16±8.28             | 238      | 79.12±7.22            | 1,482                    | 619   | 77.37±8.95             | 863      | 80.49±7.73            |
| CHARGE                        | Whole exome sequencing  | 2,398            | 31.65                                  | 759                      | 323   | 80.39±4.41             | 436      | 79.44±6.76            | 1,639                    | 269   | 82.04±4.76             | 1,370    | 80.53±6.82            |
| ADGC                          | HRC imputation          | 18,536           | 45.99                                  | 8,525                    | 5,886 | 70.07±18.19            | 2,639    | 73.88±7.12            | 10,011                   | 2,842 | 70.46±22.18            | 7,169    | 74.96±8.26            |
| Subtotal                      |                         | 23,209           | 43.82                                  | 10,077                   | 6,764 |                        | 3,313    |                       | 13,132                   | 3,730 |                        | 9,402    |                       |
| Total                         |                         | 33,650           | 39.11                                  | 13,160                   | 9,141 |                        | 4,019    |                       | 20,490                   | 6,875 |                        | 13,615   |                       |
| Functional analysis in ROSMAP | Whole genome sequencing | 1,072            | 25.84                                  | 277                      | 152   | 88.42±6.32*            | 125      | 87.35±5.96*           | 795                      | 261   | 91.14±6.17*            | 530      | 88.35±6.69*           |

\* Age at death

**eTable 2.** Results for SNVs and indels in the discovery sample.

| Chr                      | Position    | rsID                      | EA | Gene                  | Impact <sup>‡</sup> | GnomAD Exomes MAF (%) | APOE E4+ subgroup |         |                         |                 |                 |                 | APOE E4- subgroup |         |                         |                 |                 |                 | Interaction with APOE E4 |                 |                 |
|--------------------------|-------------|---------------------------|----|-----------------------|---------------------|-----------------------|-------------------|---------|-------------------------|-----------------|-----------------|-----------------|-------------------|---------|-------------------------|-----------------|-----------------|-----------------|--------------------------|-----------------|-----------------|
|                          |             |                           |    |                       |                     |                       | MAC               | MAF (%) | OR (95%CI) <sup>#</sup> | P1 <sup>*</sup> | P2 <sup>*</sup> | P3 <sup>#</sup> | MAC               | MAF (%) | OR (95%CI) <sup>#</sup> | P1 <sup>*</sup> | P2 <sup>*</sup> | P3 <sup>#</sup> | Beta <sup>‡</sup>        | Se <sup>‡</sup> | P4 <sup>‡</sup> |
| <i>APOE E4+ subgroup</i> |             |                           |    |                       |                     |                       |                   |         |                         |                 |                 |                 |                   |         |                         |                 |                 |                 |                          |                 |                 |
| 1                        | 16,073,527  | rs199908593 <sup>M2</sup> | T  | SLC25A34-AS1 / TMEM82 | frameshift          | 1.3 <sup>@</sup>      | 51                | 0.86    | 0.08 (0.03,0.22)        | 8.92E-07        | 1.98E-06        | 2.72E-06        | 134               | 0.94    | 0.72 (0.51,1.04)        | 8.20E-02        | 8.30E-02        | 7.70E-02        | -1.41                    | 0.51            | 5.44E-03        |
| 2                        | 220,283,592 | rs111828114 <sup>M1</sup> | T  | DES                   | synonymous          | 3.9                   | 245               | 4.0     | 0.53 (0.41,0.7)         | 6.39E-06        | 1.46E-05        | 8.84E-06        | 523               | 3.6     | 0.89 (0.75,1.07)        | 2.19E-01        | 2.21E-01        | 2.19E-01        | 0.50                     | 0.17            | 2.57E-03        |
| 4                        | 100,460,531 | rs41275705 <sup>M1</sup>  | A  | C4ORF17               | splice region       | 2.5                   | 124               | 2.0     | 2.32 (1.62,3.32)        | 5.60E-07        | 2.69E-06        | 4.33E-06        | 380               | 2.6     | 1.26 (1.01,1.41)        | 2.86E-02        | 2.86E-02        | 3.81E-02        | 0.60                     | 0.21            | 3.52E-03        |
| 7                        | 4,830,463   | rs11766611 <sup>M2</sup>  | A  | AP5Z1                 | missense            | 2.5                   | 92                | 1.6     | 8.41 (3.03,23.35)       | 8.34E-06        | 1.04E-06        | 4.32E-05        | 188               | 1.3     | 0.96 (0.69,1.14)        | 7.78E-01        | 7.90E-01        | 7.91E-01        | -1.61                    | 0.44            | 2.89E-04        |
| 10                       | 3,143,667   | rs11542777 <sup>M2</sup>  | T  | PFKP                  | synonymous          | 1.8                   | 67                | 1.1     | 6.34 (2.57,15.64)       | 7.06E-06        | 2.39E-05        | 6.23E-05        | 188               | 1.3     | 0.86 (0.62,1.03)        | 3.59E-01        | 3.66E-01        | 3.66E-01        | -1.31                    | 0.42            | 1.83E-03        |
| 13                       | 77,672,926  | rs116957494 <sup>M2</sup> | A  | MYCBP2                | missense            | 0.1                   | 10                | 0.16    | NA                      | 1.31E-06        | 4.79E-06        | NA              | 15                | 0.1     | 0.89 (0.24,1.8)         | 8.58E-01        | 8.20E-01        | 8.60E-01        | -13.55                   | 129.03          | 9.16E-01        |
| 13                       | 111,160,304 | rs391859 <sup>M1</sup>    | A  | COL4A2 / COL4A2-AS1   | synonymous          | 8                     | 301               | 5.3     | 0.58 (0.45,0.74)        | 6.67E-06        | 1.49E-05        | 1.54E-05        | 839               | 6.1     | 0.88 (0.76,1.01)        | 5.81E-02        | 5.83E-02        | 6.90E-02        | 0.40                     | 0.14            | 5.31E-03        |
| 19                       | 18,546,678  | rs2303697 <sup>M1</sup>   | T  | ISYNA1                | synonymous          | 35.6                  | 2139              | 34.9    | 0.73 (0.64,0.84)        | 3.19E-06        | 2.75E-06        | 3.49E-06        | 4988              | 66.0    | 1 (0.93,1.04)           | 9.83E-01        | 9.82E-01        | 9.79E-01        | -0.31                    | 0.07            | 3.88E-05        |
| 19                       | 45,411,941  | rs429358 <sup>M1</sup>    | C  | APOE                  | missense            | 16.1                  | 2599              | 47.6    | 5.95 (3.75-9.42)        | 6.89E-16        | 0               | 1.79E-14        | 72                | 0.5     | 1.96 (1.25,2.5)         | 2.53E-03        | 2.77E-03        | 3.48E-03        | -1.05                    | 0.32            | 1.17E-03        |
| 20                       | 1,276,876   | rs367658252 <sup>M2</sup> | C  | SNPH                  | 5_prime_UTR         | 0.9                   | 69                | 1.2     | 13.25 (4.52-38.83)      | 4.96E-07        | 1.27E-07        | 1.93E-06        | 182               | 1.3     | 0.94 (0.67,1.13)        | 6.78E-01        | 6.87E-01        | 7.10E-01        | -1.99                    | 0.51            | 8.46E-05        |
| 21                       | 33,717,877  | rs2833779 <sup>M2</sup>   | A  | URB1                  | synonymous          | 9.7                   | 496               | 8.8     | 2.14 (1.48,3.09)        | 2.08E-06        | 1.94E-05        | 5.16E-05        | 1197              | 8.7     | 1.1 (0.96,1.18)         | 1.67E-01        | 1.67E-01        | 1.54E-01        | -0.48                    | 0.17            | 3.79E-03        |
| 21                       | 33,738,920  | rs10222086 <sup>M2</sup>  | C  | URB1                  | splice region       | 9.4                   | 450               | 7.9     | 2.3 (1.54,3.45)         | 1.98E-06        | 1.46E-05        | 5.48E-05        | 1129              | 8.1     | 1.05 (0.91,1.13)        | 5.22E-01        | 5.20E-01        | 5.09E-01        | -0.62                    | 0.18            | 6.32E-04        |
| <i>APOE E4- subgroup</i> |             |                           |    |                       |                     |                       |                   |         |                         |                 |                 |                 |                   |         |                         |                 |                 |                 |                          |                 |                 |
| 6                        | 41,129,252  | rs75932628 <sup>M1</sup>  | T  | TREM2                 | missense            | 0.2                   | 51                | 0.83    | 4.58 (1.43,8.6)         | 4.78E-03        | 2.24E-03        | 1.04E-02        | 68                | 0.50    | 4.85 (2.74-8.60)        | 2.12E-09        | 2.38E-09        | 4.59E-08        | 0.05                     | 0.66            | 9.44E-01        |
| 6                        | 142,468,449 | rs2232299 <sup>M2</sup>   | C  | VTA1                  | missense            | 0.02                  | 6                 | 0.1     | 0.86 (0.08,3.21)        | 9.51E-01        | 7.27E-01        | 9.04E-01        | 14                | 0.10    | 0.04 (0.01,0.2)         | 1.72E-06        | 4.01E-06        | 1.49E-04        | 3.79                     | 1.44            | 8.64E-03        |
| 7                        | 154,988,675 | rs536940594 <sup>M2</sup> | A  | AC099552              | synonymous          | 0                     | 0                 | 0       | NA                      | NA              | NA              | NA              | 10                | 0.10    | 87.96 (9.08-851.98)     | 2.22E-07        | 8.80E-07        | 9.47E-05        | NA                       | NA              | NA              |

|    |             |                           |   |               |            |      |      |      |                     |          |          |          |      |      |                      |          |          |          |       |      |          |
|----|-------------|---------------------------|---|---------------|------------|------|------|------|---------------------|----------|----------|----------|------|------|----------------------|----------|----------|----------|-------|------|----------|
| 8  | 144,995,964 | rs35139934 <sup>M1</sup>  | A | PLEC          | synonymous | 7.4  | 476  | 7.8  | 1.13<br>(0.89,1.28) | 3.15E-01 | 3.25E-01 | 3.16E-01 | 1131 | 7.8  | 1.34,<br>(1.19,1.51) | 1.88E-06 | 2.09E-06 | 2.23E-06 | 0.18  | 0.13 | 1.82E-01 |
| 8  | 145,138,063 | rs138412600 <sup>M2</sup> | A | GPAA1         | synonymous | 2    | 106  | 1.7  | 0.64<br>(0.31,1.35) | 2.66E-01 | 1.99E-01 | 2.43E-01 | 239  | 2.0  | 2.13<br>(1.59-2.87)  | 2.70E-07 | 3.85E-07 | 3.91E-07 | 1.10  | 0.33 | 8.12E-04 |
| 17 | 44,076,665  | rs62063857 <sup>M1</sup>  | A | MAPT /<br>STH | missense   | 18.8 | 749  | 14.7 | 1.22<br>(1.03,1.33) | 2.13E-02 | 2.25E-02 | 2.41E-02 | 2063 | 16.3 | 1.25<br>(1.14,1.37)  | 1.83E-06 | 1.67E-06 | 4.23E-06 | -0.05 | 0.10 | 5.83E-01 |
| 17 | 44,828,931  | rs199533 <sup>M1</sup>    | A | NSF           | synonymous | 17.8 | 1239 | 20.2 | 0.89<br>(0.77,1.03) | 1.25E-01 | 1.26E-01 | 1.24E-01 | 2983 | 20.3 | 0.82<br>(0.76,0.89)  | 3.97E-06 | 3.79E-06 | 4.28E-06 | -0.09 | 0.09 | 2.82E-01 |
| 19 | 1,047,507   | 19:1047507 <sup>M1</sup>  | A | ABCA7         | frameshift | NA   | 26   | 0.43 | 2.23<br>(0.66,4.29) | 1.88E-01 | 2.16E-01 | 1.95E-01 | 40   | 0.28 | 4.64<br>(2.2,9.8)    | 9.76E-06 | 9.75E-06 | 5.51E-05 | 0.71  | 0.72 | 3.31E-01 |
| 19 | 45,316,588  | rs28399654 <sup>M1</sup>  | A | BCAM          | missense   | 2.9  | 121  | 2.0  | 0.71<br>(0.48,1.07) | 1.01E-01 | 1.01E-01 | 1.03E-01 | 538  | 3.7  | 0.66,<br>(0.55,0.79) | 6.70E-06 | 5.40E-06 | 7.93E-06 | -0.09 | 0.23 | 7.05E-01 |
| 19 | 45,395,714  | rs157581 <sup>M12</sup>   | T | TOMM40        | synonymous | 22.3 | 2871 | 53.1 | 1<br>(0.73,1.19)    | 8.18E-01 | 7.57E-01 | 9.92E-01 | 1501 | 10.2 | 1.36<br>(1.2,1.54)   | 1.43E-06 | 1.26E-06 | 1.61E-06 | -0.38 | 0.15 | 8.82E-03 |

%Variant impact annotated by SnpEff and VEP. High: splice acceptor, splice donor, stop gained, frameshift, stop lost, start lost, or transcript amplification; Moderate: inframe insertion inframe deletion, missense variant, or protein altering; Low: initiator codon, stop retain, in splice region, 5' UTR premature start codon gain, synonymous variant, start retain; Modifier: the variant hits the coding sequence or a gene, upstream or downstream gene, intron, exon, intergenic region, conserved intergenic or intron region, miRNA, transcript, regulatory region, 3' or 5' UTR region.

@ExAC European MAF reference

\*P1 and P2 represent the P-value for score and firth test, respectively

#OR (95%CI) represent the estimate of the odds ratio of AD cases and its 95% confidence interval based on generalized linear model, and P3 represents the corresponding P value

&Beta, SE, and P4 represent the estimate of the regression coefficient, standard error, and significance level of the interaction term of SNV\*APOE4 in the generalized linear model

<sup>M1</sup>All the statistics and estimates are based on Model 1, which adjusted for principle components only

<sup>M2</sup>All the statistics and estimates are based on Model 2, which adjusted for age, sex, and principle components

<sup>M12</sup>The SNP is significant in both Model 1 and 2, but the statistics in Model 2 is presented.

EA = effect allele; MAC = minor allele count; MAF = minor allele frequency.



**eTable 3.** Meta-analysis results for SNVs and indels in the discovery and replication samples.

| Discovery                                           |             |                           |    |                       |                         |                |                 |                |                         |                |         |                         |                |         |                         |                |                         |                |                         |                | Replication |  |  |  |  |  | Discovery + Replication |  |
|-----------------------------------------------------|-------------|---------------------------|----|-----------------------|-------------------------|----------------|-----------------|----------------|-------------------------|----------------|---------|-------------------------|----------------|---------|-------------------------|----------------|-------------------------|----------------|-------------------------|----------------|-------------|--|--|--|--|--|-------------------------|--|
| Chr                                                 | BP          | rsID                      | EA | Gene                  | ADSP                    |                | ADGC            |                |                         |                | ADES-FR |                         |                | CHARGE  |                         |                | Total Replication       |                | OR (95%CI) <sup>#</sup> | P <sup>#</sup> |             |  |  |  |  |  |                         |  |
|                                                     |             |                           |    |                       | OR (95%CI) <sup>#</sup> | P <sup>#</sup> | R <sup>2*</sup> | MAF Range (%)* | OR (95%CI) <sup>#</sup> | P <sup>#</sup> | MAF (%) | OR (95%CI) <sup>#</sup> | P <sup>#</sup> | MAF (%) | OR (95%CI) <sup>#</sup> | P <sup>#</sup> | OR (95%CI) <sup>#</sup> | P <sup>#</sup> |                         |                |             |  |  |  |  |  |                         |  |
|                                                     |             |                           |    |                       |                         |                |                 |                |                         |                |         |                         |                |         |                         |                |                         |                |                         |                |             |  |  |  |  |  |                         |  |
| <b>Top variants identified in APOE E4+ subgroup</b> |             |                           |    |                       |                         |                |                 |                |                         |                |         |                         |                |         |                         |                |                         |                |                         |                |             |  |  |  |  |  |                         |  |
| 1                                                   | 16,073,527  | rs199908593 <sup>M2</sup> | T  | SLC25A34-AS1 / TMEM82 | 0.08 (0.03,0.22)        | 2.72E-06       | NA              | NA             | NA                      | NA             | 2.4     | 1.19 (0.59,2.4)         | 0.64           | 2.20    | 1.3 (0.6,2.83)          | 0.51           | 1.13 (0.59,2.15)        | 0.71           | 0.56 (0.32,0.97)        | 0.04           |             |  |  |  |  |  |                         |  |
| 2                                                   | 220,283,592 | rs111828114 <sup>M1</sup> | T  | DES                   | 0.53 (0.41,0.7)         | 8.84E-06       | (0.45,0.72)     | (1.3, 5.7)     | 0.84 (0.64,1.09)        | 0.18           | 3.7     | 0.82 (0.48,1.42)        | 0.48           | 3.0     | 1.03 (0.55,1.93)        | 0.92           | 0.88 (0.7,1.11)         | 0.27           | 0.72 (0.6,0.85)         | 2.18E-04       |             |  |  |  |  |  |                         |  |
| 4                                                   | 100,460,531 | rs41275705 <sup>M1</sup>  | A  | C4ORF17               | 2.32 (1.62,3.32)        | 4.33E-06       | (0.81,0.99)     | (1.5, 7.1)     | 1.11 (0.92,1.35)        | 0.28           | 3.4     | 1.95 (1.11,3.44)        | 0.02           | 3.6     | 1.41 (0.76,2.59)        | 0.28           | 1.19 (0.99,1.42)        | 0.06           | 1.36 (1.16,1.6)         | 1.80E-04       |             |  |  |  |  |  |                         |  |
| 7                                                   | 4,830,463   | rs11766611 <sup>M2</sup>  | A  | AP5Z1                 | 8.41 (3.03,23.35)       | 4.32E-05       | (0.41,0.56)     | (1.6, 2.7)     | 0.72 (0.41,1.26)        | 0.26           | 2.7     | 1.17 (0.54,2.51)        | 0.70           | 1.7     | 2.07 (0.89,4.81)        | 0.09           | 0.96 (0.63,1.48)        | 0.86           | 1.34 (0.9,1.99)         | 0.15           |             |  |  |  |  |  |                         |  |
| 10                                                  | 3,143,667   | rs11542777 <sup>M2</sup>  | T  | PFKP                  | 6.34 (2.57,15.64)       | 6.23E-05       | (0.47,0.99)     | (0.23, 2.8)    | 0.94 (0.67,1.33)        | 0.73           | 2.4     | 0.67 (0.32,1.4)         | 0.29           | 1.3     | 1.02 (0.39,2.66)        | 0.98           | 0.87 (0.64,1.17)        | 0.35           | 1.06 (0.79,1.41)        | 0.70           |             |  |  |  |  |  |                         |  |
| 13                                                  | 77,672,926  | rs116957494 <sup>M2</sup> | A  | MYCBP2                | NA                      | NA             | (0.41,0.84)     | (0.03, 0.35)   | 1.05 (0.1,11.16)        | 0.97           | 0.32    | Inf (0,Inf)             | 0.98           | 0.13    | 0.06 (0,1.14)           | 0.06           | 1.05 (0.1,11.15)        | 0.97           | 1.05 (0.1,11.15)        | 0.97           |             |  |  |  |  |  |                         |  |
| 13                                                  | 111,160,304 | rs391859 <sup>M1</sup>    | A  | COL4A2 / COL4A2-AS1   | 0.58 (0.45,0.74)        | 1.54E-05       | (0.81,0.999)    | (6.2, 14.2)    | 1.04 (0.92,1.18)        | 0.51           | 9.7     | 0.98 (0.67,1.41)        | 0.90           | 7.5     | 0.99 (0.67,1.49)        | 0.98           | 1.03 (0.92,1.16)        | 0.60           | 0.93 (0.84,1.03)        | 0.17           |             |  |  |  |  |  |                         |  |
| 19                                                  | 18,546,678  | rs2303697 <sup>M1</sup>   | T  | ISYNA1                | 0.73 (0.64,0.84)        | 3.49E-06       | (0.9,0.997)     | (30.7, 39.8)   | 0.88 (0.81,0.95)        | 6.84E-04       | 35.9    | 0.96 (0.76,1.2)         | 0.72           | 32.5    | 1.02 (0.81,1.28)        | 0.87           | 0.89 (0.83,0.96)        | 1.26E-03       | 0.85 (0.8,0.91)         | 4.61E-07       |             |  |  |  |  |  |                         |  |
| 19                                                  | 45,411,941  | rs429358 <sup>M1</sup>    | C  | APOE                  | 5.95 (3.75-9.42)        | 1.79E-14       | (0.41,0.7)      | (37.6, 39.1)   | 4.13 (3.24-5.25)        | 2.60E-31       | 44.3    | 3.67 (1.91,7.05)        | 9.54E-05       | NA      | NA                      | NA             | 3.99 (3.21,4.96)        | 1.99E-35       | 4.3 (3.53,5.23)         | 9.83E-48       |             |  |  |  |  |  |                         |  |
| 20                                                  | 1,276,876   | rs367658252 <sup>M2</sup> | C  | SNPH                  | 13.25 (4.52-38.83)      | 1.93E-06       | (0.65,0.97)     | (0.07, 2.0)    | 0.77 (0.55-1.06)        | 0.11           | 1.1     | 0.66 (0.23,1.92)        | 0.45           | 0.59    | 0.41 (0.08,2.03)        | 0.27           | 0.79 (0.58,1.07)        | 0.13           | 0.98 (0.73,1.31)        | 0.87           |             |  |  |  |  |  |                         |  |
| 21                                                  | 33,717,877  | rs2833779 <sup>M2</sup>   | A  | URB1                  | 2.14 (1.48,3.09)        | 5.16E-05       | (0.8,0.998)     | (9.2, 17.8)    | 0.93 (0.83,1.04)        | 0.20           | 11.1    | 1.03 (0.7,1.51)         | 0.90           | 11.9    | 0.81 (0.57,1.14)        | 0.23           | 0.93 (0.84,1.04)        | 0.21           | 1 (0.9,1.1)             | 0.92           |             |  |  |  |  |  |                         |  |
| 21                                                  | 33,738,920  | rs10222086 <sup>M2</sup>  | C  | URB1                  | 2.3 (1.54,3.45)         | 5.48E-05       | (0.9,0.995)     | (8.8, 15.2)    | 0.93 (0.83,1.04)        | 0.20           | 10.4    | 0.96 (0.64,1.42)        | 0.82           | 10.8    | 0.75 (0.52,1.07)        | 0.12           | 0.93 (0.83,1.04)        | 0.19           | 0.99 (0.89,1.1)         | 0.84           |             |  |  |  |  |  |                         |  |
| <b>Top variants identified in APOE E4- subgroup</b> |             |                           |    |                       |                         |                |                 |                |                         |                |         |                         |                |         |                         |                |                         |                |                         |                |             |  |  |  |  |  |                         |  |
| 6                                                   | 41,129,252  | rs75932628 <sup>M1</sup>  | T  | TREM2                 | 4.85 (2.74-8.60)        | 4.59E-08       | (0.6,0.99)      | (0.08, 1.1)    | 2.84 (1.37-5.89)        | 4.67E-03       | 0.34    | NA                      | NA             | 0.12    | 0.29 (0.02,3.75)        | 0.34           | 2.4 (1.2,4.81)          | 0.01           | 3.66 (2.36,5.68)        | 6.84E-09       |             |  |  |  |  |  |                         |  |
| 6                                                   | 142,468,449 | rs2232299 <sup>M2</sup>   | C  | VTA1                  | 0.04 (0.01,0.2)         | 1.49E-04       | (0.56,0.998)    | (0, 0.77)      | 0.07 (0,16.18)          | 0.34           | 0.03    | 0 (0,Inf)               | 0.97           | 0.06    | 2.98 (0,2189.88)        | 0.75           | 0.32 (0,21.34)          | 0.59           | 0.05 (0,0.24)           | 2.08E-04       |             |  |  |  |  |  |                         |  |
| 7                                                   | 154,988,675 | rs536940594 <sup>M2</sup> | A  | AC099552              | 87.96 (9.08-851.98)     | 9.47E-05       | NA              | NA             | NA                      | NA             | NA      | NA                      | NA             | NA      | NA                      | NA             | NA                      | NA             | NA                      | NA             |             |  |  |  |  |  |                         |  |
| 8                                                   | 144,995,964 | rs35139934 <sup>M1</sup>  | A  | PLEC                  | 1.34 (1.19,1.51)        | 2.23E-06       | (0.4,0.77)      | (6.3, 11.4)    | 1.31 (1.11,1.53)        | 1.06E-03       | 8.1     | 0.84 (0.64,1.11)        | 0.23           | 6.8     | 0.71 (0.49,1.03)        | 0.07           | 1.1 (0.97,1.25)         | 0.1416         | 1.22 (1.12,1.34)        | 8.17E-06       |             |  |  |  |  |  |                         |  |
| 8                                                   | 145,138,063 | rs138412600 <sup>M2</sup> | A  | GPAA1                 | 2.13 (1.59-2.87)        | 3.91E-07       | (0.42,0.91)     | (0.81, 2.4)    | 1.5 (1.03-2.38)         | 0.03           | 1.5     | 1.08 (0.6,1.97)         | 0.79           | 2.2     | 1.79 (0.92,3.47)        | 0.08           | 1.47 (1.08,1.98)        | 0.01           | 1.78 (1.44,2.2)         | 7.81E-08       |             |  |  |  |  |  |                         |  |

|    |            |                              |   |               |                      |          |              |                 |                     |          |      |                     |      |      |                     |      |                     |          |                     |          |
|----|------------|------------------------------|---|---------------|----------------------|----------|--------------|-----------------|---------------------|----------|------|---------------------|------|------|---------------------|------|---------------------|----------|---------------------|----------|
| 17 | 44,076,665 | rs62063857 <sup>M1</sup>     | A | MAPT /<br>STH | 1.25<br>(1.14,1.37)  | 4.23E-06 | (0.8,0.998)  | (17.9,<br>27.4) | 1.12<br>(1.03,1.22) | 5.42E-03 | 25.0 | 1.06<br>(0.89,1.25) | 0.53 | 9.6  | 1.38<br>(0.97,1.96) | 0.07 | 1.12<br>(1.04,1.2)  | 2.03E-03 | 1.17<br>(1.1,1.23)  | 1.59E-07 |
| 17 | 44,828,931 | rs199533 <sup>M1</sup>       | A | NSF           | 0.82<br>(0.76,0.89)  | 4.28E-06 | (0.85,0.997) | (16.3,<br>25.4) | 0.89<br>(0.82,0.97) | 8.64E-03 | 23.5 | 0.96<br>(0.8,1.14)  | 0.61 | 20.0 | 0.83<br>(0.66,1.05) | 0.12 | 0.9<br>(0.83,0.96)  | 3.38E-03 | 0.86<br>(0.82,0.91) | 1.66E-07 |
| 19 | 1,047,507  | chr19bp1047507 <sup>M1</sup> | A | ABCA7         | 4.64,<br>(2.2,9.8)   | 5.51E-05 | NA           | NA              | NA                  | NA       | 0.24 | 0.24<br>(0.03,2.03) | 0.19 | NA   | NA                  | NA   | NA                  | NA       | 3.36<br>(1.66,6.79) | 7.49E-04 |
| 19 | 45,316,588 | rs28399654 <sup>M1</sup>     | A | BCAM          | 0.66,<br>(0.55,0.79) | 7.93E-06 | (0.61,0.99)  | (1.2,<br>5.6)   | 0.92<br>(0.75,1.14) | 0.44     | 3.3  | 0.74<br>(0.48,1.13) | 0.17 | 3.2  | 0.74<br>(0.43,1.28) | 0.28 | 0.87<br>(0.73,1.04) | 0.1154   | 0.76<br>(0.67,0.86) | 2.25E-05 |
| 19 | 45,395,714 | rs157581 <sup>M12</sup>      | T | TOMM40        | 1.36<br>(1.2,1.54)   | 1.61E-06 | (0.41,0.999) | (6.2,<br>14.8)  | 1.14<br>(1.01,1.29) | 0.04     | 8.7  | NA                  | NA   | 10.4 | 0.99<br>(0.72,1.35) | 0.93 | 1.12<br>(1.1,1.26)  | 0.05     | 1.22<br>(1.13,1.33) | 2.50E-06 |

@ ExAC European MAF reference

\*R2 and MAF represent the range of imputation quality and minor allele frequency (minimum value, maximum value) across cohorts of replication ADGC.

#OR (95%CI) represent the estimate of the odds ratio of AD cases and its 95% confidence interval based on generalized linear model, and P represents the corresponding P value

<sup>M1</sup>All the statistics and estimates are based on Model 1, which adjusted for principle components only.

<sup>M2</sup>All the statistics and estimates are based on Model 2, which adjusted for age, sex, and principle components

<sup>M12</sup> The SNP is significant in both Model 1 and 2, but the statistics in Model 2 is presented.

EA = effect allele; MAC = minor allele count.



**eTable 4.** Results of gene-based tests in the discovery and replication samples

| <i>APOE</i><br>Group | Chr | Start     | End       | Gene           | SNV<br>impact      | Model | P values |                     |          |          |          | All      | Sentinel<br>SNP in<br>Replic. <sup>a</sup> |
|----------------------|-----|-----------|-----------|----------------|--------------------|-------|----------|---------------------|----------|----------|----------|----------|--------------------------------------------|
|                      |     |           |           |                |                    |       | ADSP     | Replication Cohorts |          |          | Meta     |          |                                            |
|                      |     |           |           |                |                    |       | ADGC     | ADES-FR             | CHARGE   |          |          |          |                                            |
| ε4+                  | 11  | 124134751 | 124135752 | <i>OR8G5</i>   | High +<br>Moderate | 2     | 4.67E-07 | 7.77E-02            | 6.58E-01 | 4.79E-01 | 0.05     | 3.54E-05 | No                                         |
|                      | 14  | 106518415 | 106518824 | <i>IGHV3-7</i> | All                | 2     | 9.75E-16 | 6.06E-02            | NA       | 8.90E-01 | 0.07     | 3.69E-08 | No                                         |
|                      | 20  | 19261606  | 19261724  | <i>SLC24A3</i> | All                | 2     | 2.67E-12 | 4.58E-01            | 7.97E-01 | 3.97E-02 | 0.19     | 5.73E-06 | No                                         |
| ε4-                  | 6   | 41126505  | 41130815  | <i>TREM2</i>   | High +<br>Moderate | 1     | 2.75E-08 | 1.11E-03            | 2.51E-02 | 8.00E-01 | 2.25E-04 | 4.75E-10 | Yes                                        |

<sup>a</sup> Sentinel SNP accounting for significance in ADSP discovery sample present in any replication datasets (yes/no)

**eFigure 1.** QQ plots for association in the discovery sample by analysis model and *APOE* genotype. (A) *APOE*  $\epsilon 4+$ , Model 1; (B) *APOE*  $\epsilon 4+$ , Model 2; (C) *APOE*  $\epsilon 4-$ , Model 1; (D) *APOE*  $\epsilon 4-$ , Model 2.

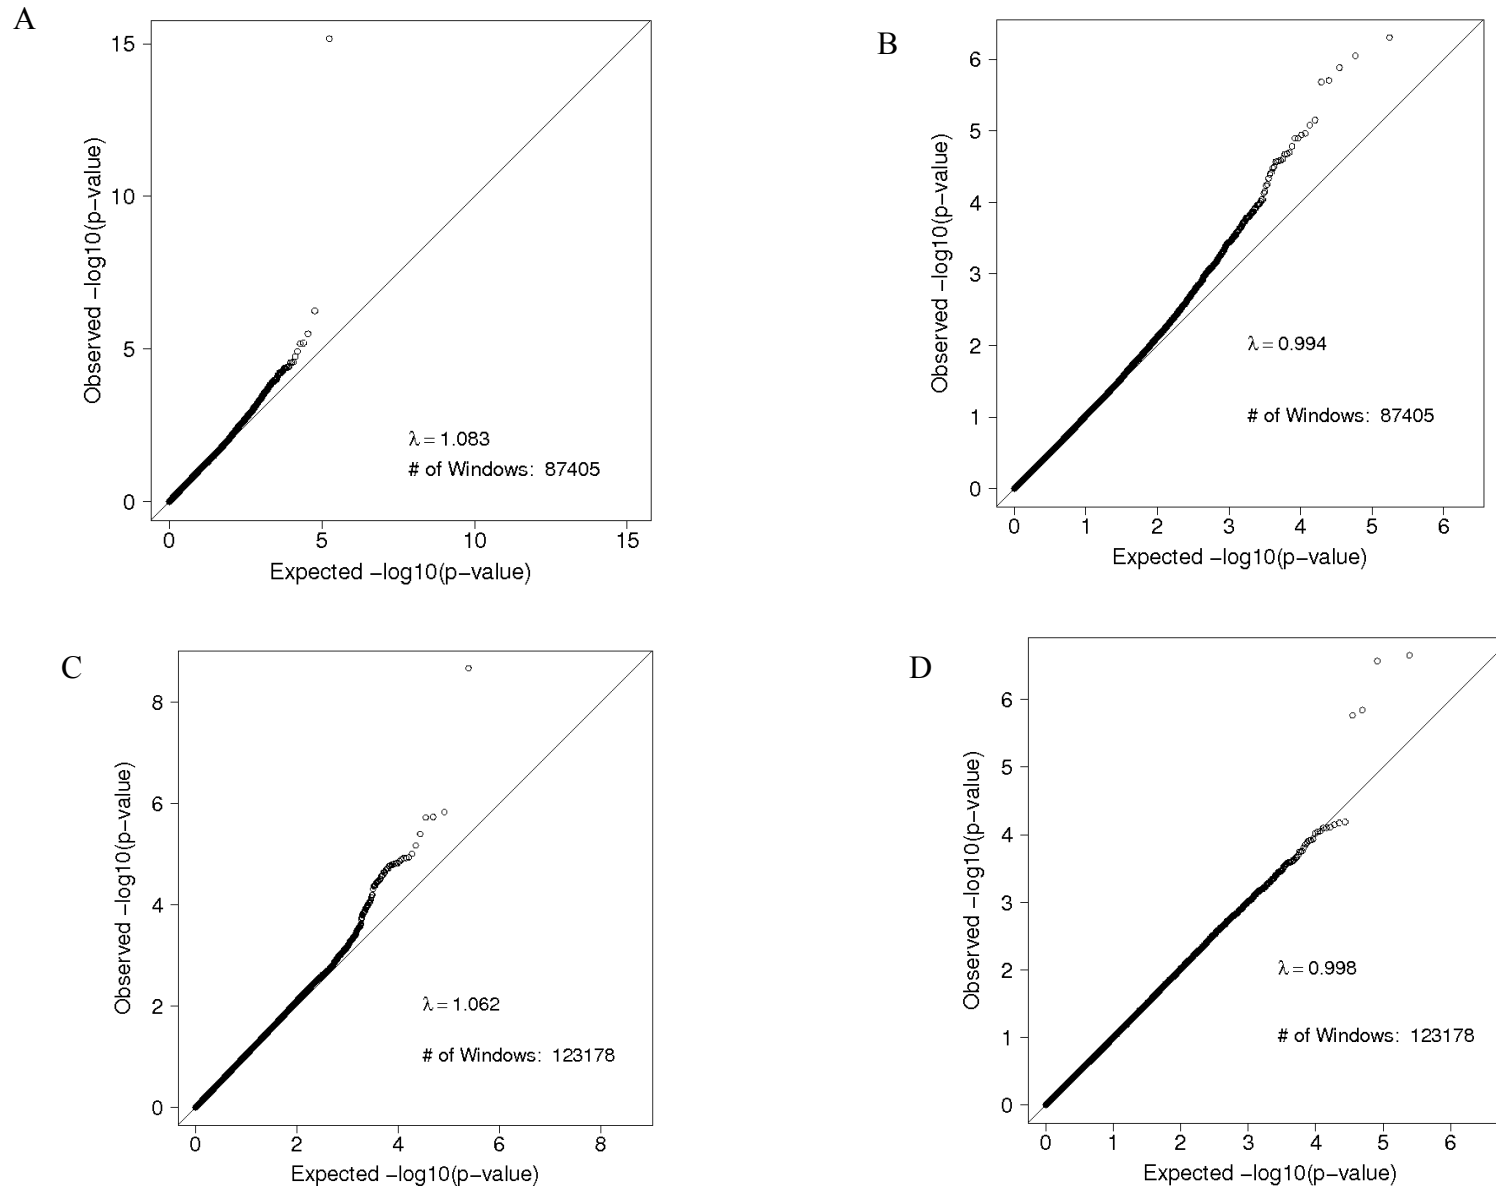

**eFigure 2.** Manhattan plots for association in the discovery sample by analysis model and *APOE* genotype. Observed  $-\log P$ -values (y-axis) are shown for each variant grouped by chromosome (x-axis). (A)  $\epsilon 4+$ , Model 1; (B)  $\epsilon 4+$ , Model 2; (C)  $\epsilon 4-$ , Model 1; (D)  $\epsilon 4-$ , Model 2. Model 1 adjusts for principle components (PCs) and Model 2 adjusts for PCs, age and sex. Variants with discovery  $P$ -values  $< 1 \times 10^{-5}$  are shown above the dotted line and were further evaluated in the replication sample.

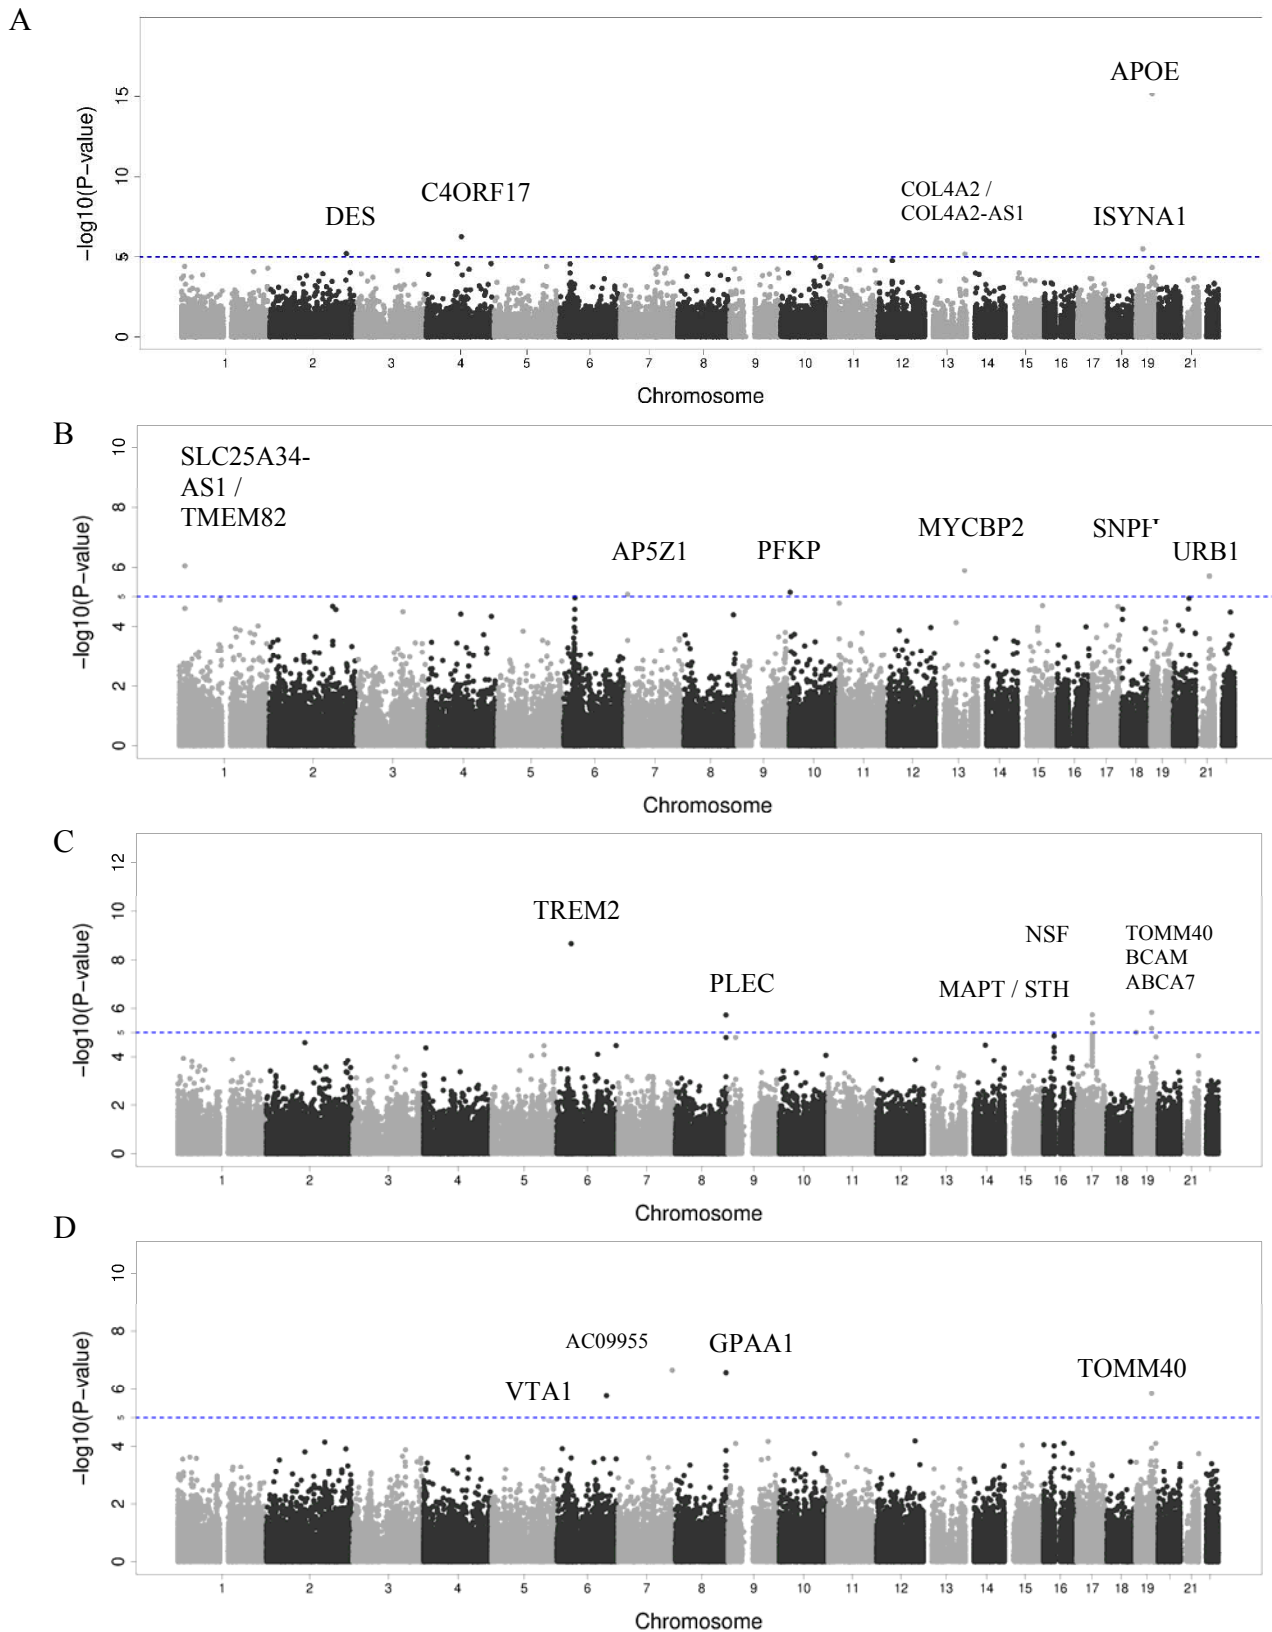

**eFigure 3.** Association of Alzheimer disease with variants in the *ISYNA1* region. (A) Regional Manhattan plot in the *APOE*  $\epsilon 4+$  (upper) and *APOE*  $\epsilon 4-$  (lower) subgroups in the discovery ADSP sample. SNPs with the lowest *P*-value are indicated with a purple diamond, and the estimated linkage

disequilibrium ( $r^2$ ) between the top SNP and other SNPs in the region are shown as circles with the color coding: red =  $r^2 \geq 0.8$ , orange =  $0.6 \leq r^2 < 0.8$ , green =  $0.4 \leq r^2 < 0.6$ , light blue =  $0.2 \leq r^2 < 0.4$ , and blue =  $r^2 < 0.2$ . Grey circles represent unannotated SNPs. (B) Forest plot of association results in each cohort in the *APOE*  $\epsilon_4+$  group. OR = odds ratio. The filled symbol and horizontal line indicate the estimated odds ratio and its 95% confidence interval per dosage of the rs2303697 T allele on the risk of AD. Both plots show the results using Model 1, which adjusts for principle components of ancestry.

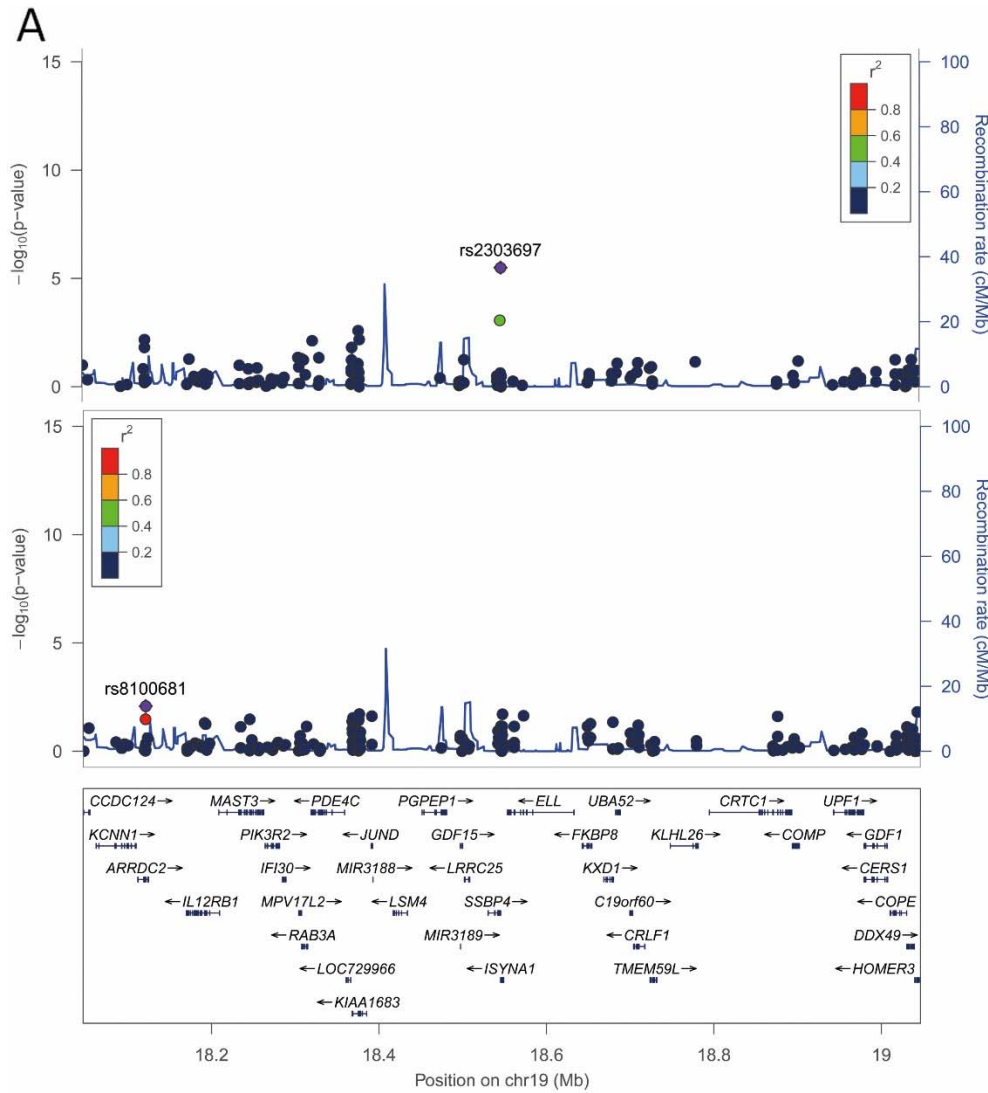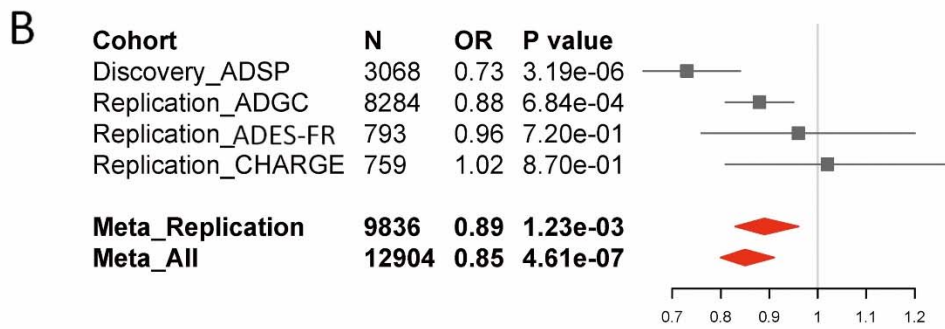

**eFigure 4.** Association of Alzheimer disease with variants in the *TREM2* region. (A) Regional Manhattan plot in the *APOE*  $\epsilon 4+$  (upper) and *APOE*  $\epsilon 4-$  (lower) subgroups in the discovery ADSP sample. SNPs with the lowest *P*-value are indicated with a purple diamond, and the estimated linkage disequilibrium ( $r^2$ ) between the top SNP and other SNPs in the region are shown as circles with the color coding: red =  $r^2 \geq 0.8$ , orange =  $0.6 \leq r^2 < 0.8$ , green =  $0.4 \leq r^2 < 0.6$ , light blue =  $0.2 \leq r^2 < 0.4$ , and blue =  $r^2 < 0.2$ . Grey circles represent unannotated SNPs. (B) Forest plot of association results in each cohort in the *APOE*  $\epsilon 4+$  group. OR = odds ratio. The filled symbol and horizontal line indicate the estimated odds ratio and its 95% confidence interval per dosage of the rs75932628 A allele on the risk of AD. Both plots show the results using Model 1, which adjusts for principle components of ancestry.

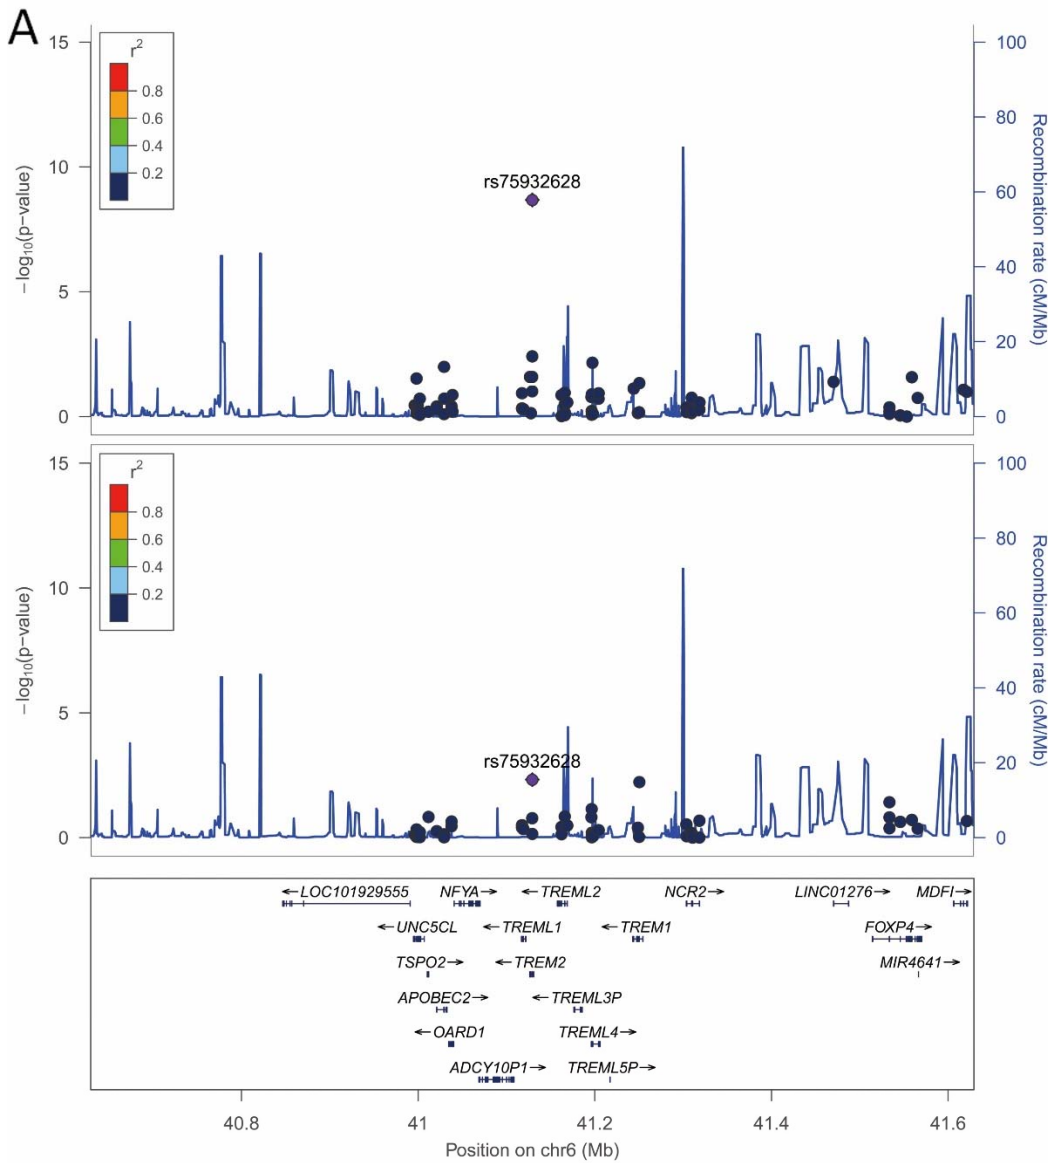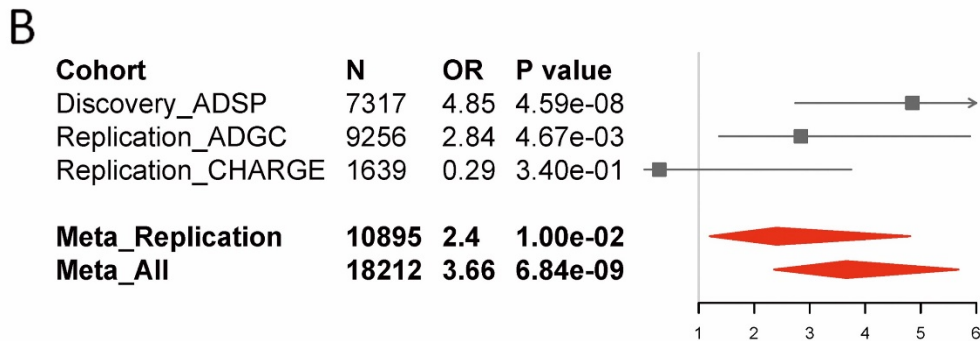

**eFigure 5.** Association of Alzheimer disease with variants in the region including *MAPT* and *NSF*. (A) Regional Manhattan plot in the *APOE*  $\epsilon 4+$  (upper) and *APOE*  $\epsilon 4-$  (lower) subgroups in the discovery ADSP sample. SNPs with the lowest *P*-value are indicated with a purple diamond, and the estimated linkage disequilibrium ( $r^2$ ) between the top SNP and other SNPs in the region are shown as circles with the color coding: red =  $r^2 \geq 0.8$ , orange =  $0.6 \leq r^2 < 0.8$ , green =  $0.4 \leq r^2 < 0.6$ , light blue =  $0.2 \leq r^2 < 0.4$ , and blue =  $r^2 < 0.2$ . Grey circles represent unannotated SNPs. (B) Forest plot of association results for *MAPT* in each cohort in the *APOE*  $\epsilon 4-$  group. The filled symbol and horizontal line indicate the estimated odds ratio (OR) and its 95% confidence interval per dosage of the rs62063857 A allele on the risk of AD. (C) Forest

plot of association results for *NSF* in each cohort in the *APOE*  $\epsilon 4$ - group. The filled symbol and horizontal line indicate the estimated odds ratio (OR) and its 95% confidence interval per dosage of the rs199533 A allele on the risk of AD. All plots show the results using Model 1, which adjusts for principle components of ancestry.

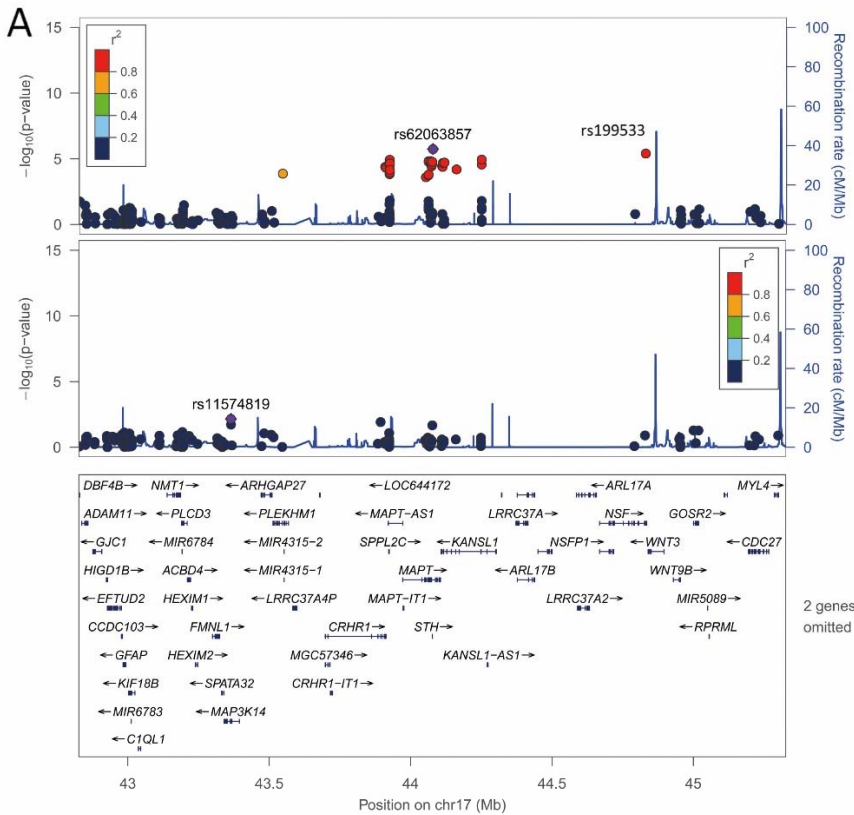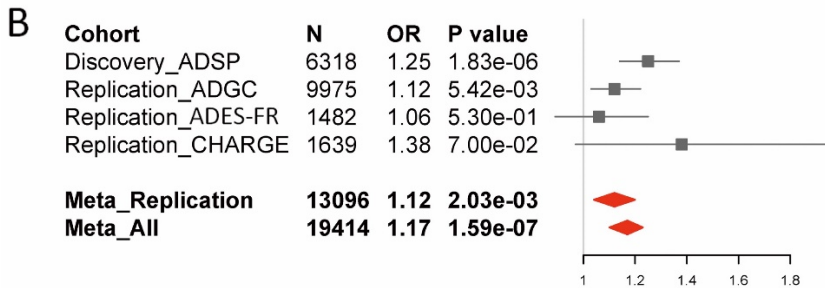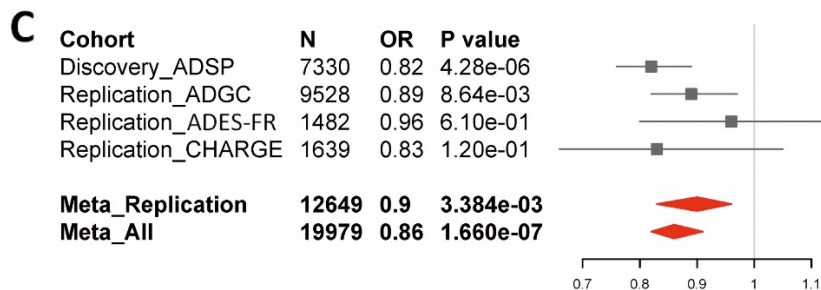

**eFigure 6.** Association of Alzheimer disease with variants in the *GPAA1* region. (A) Regional Manhattan plot in the *APOE*  $\epsilon 4$ + (upper) and *APOE*  $\epsilon 4$ - (lower) subgroups in the discovery ADSP sample. SNPs with the lowest *P*-value are indicated with a purple diamond, and the estimated linkage disequilibrium ( $r^2$ ) between the top SNP and other SNPs in the region are shown as circles with the color coding: red =  $r^2 \geq 0.8$ , orange =  $0.6 \leq r^2 < 0.8$ , green =  $0.4 \leq r^2 < 0.6$ , light blue =  $0.2 \leq r^2 < 0.4$ , and blue



=  $r^2 < 0.2$ . Grey circles represent unannotated SNPs. (B) Forest plot of association results in each cohort in the *APOE*  $\epsilon_4+$  group. OR = odds ratio. The filled symbol and horizontal line indicate the estimated odds ratio and its 95% confidence interval per dosage of the rs138412600 A allele on the risk of AD. Both plots show the results using Model 2, which adjusts for principle components of ancestry, age, sex, and sequencing center.

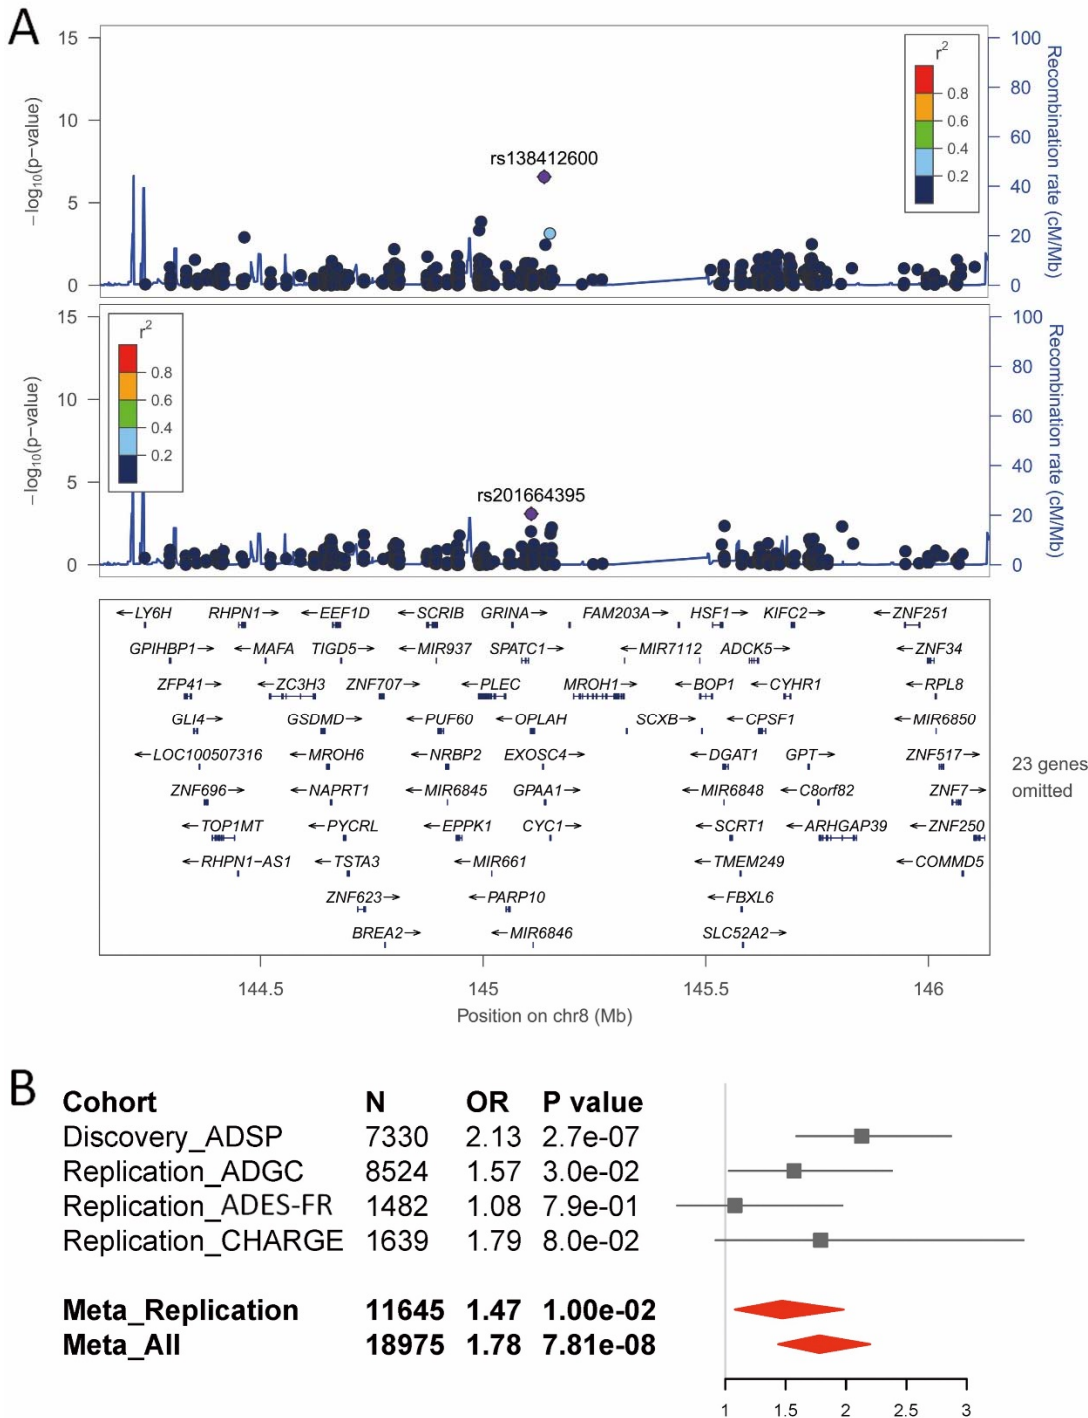

**eFigure 7.** Regional Manhattan plot in the *APOE*  $\epsilon_4-$  subgroup showing association of Alzheimer disease with variants in the *AC099552* region using Model 2, which adjusts for principle components

of ancestry, age, sex, and sequencing center. SNPs with the lowest  $P$ -value are indicated with a purple diamond, and the estimated linkage disequilibrium ( $r^2$ ) between the top SNP and other SNPs in the region are shown as circles with the color coding: red =  $r^2 \geq 0.8$ , orange =  $0.6 \leq r^2 < 0.8$ , green =  $0.4 \leq r^2 < 0.6$ , light blue =  $0.2 \leq r^2 < 0.4$ , and blue =  $r^2 < 0.2$ . Grey circles represent unannotated SNPs.

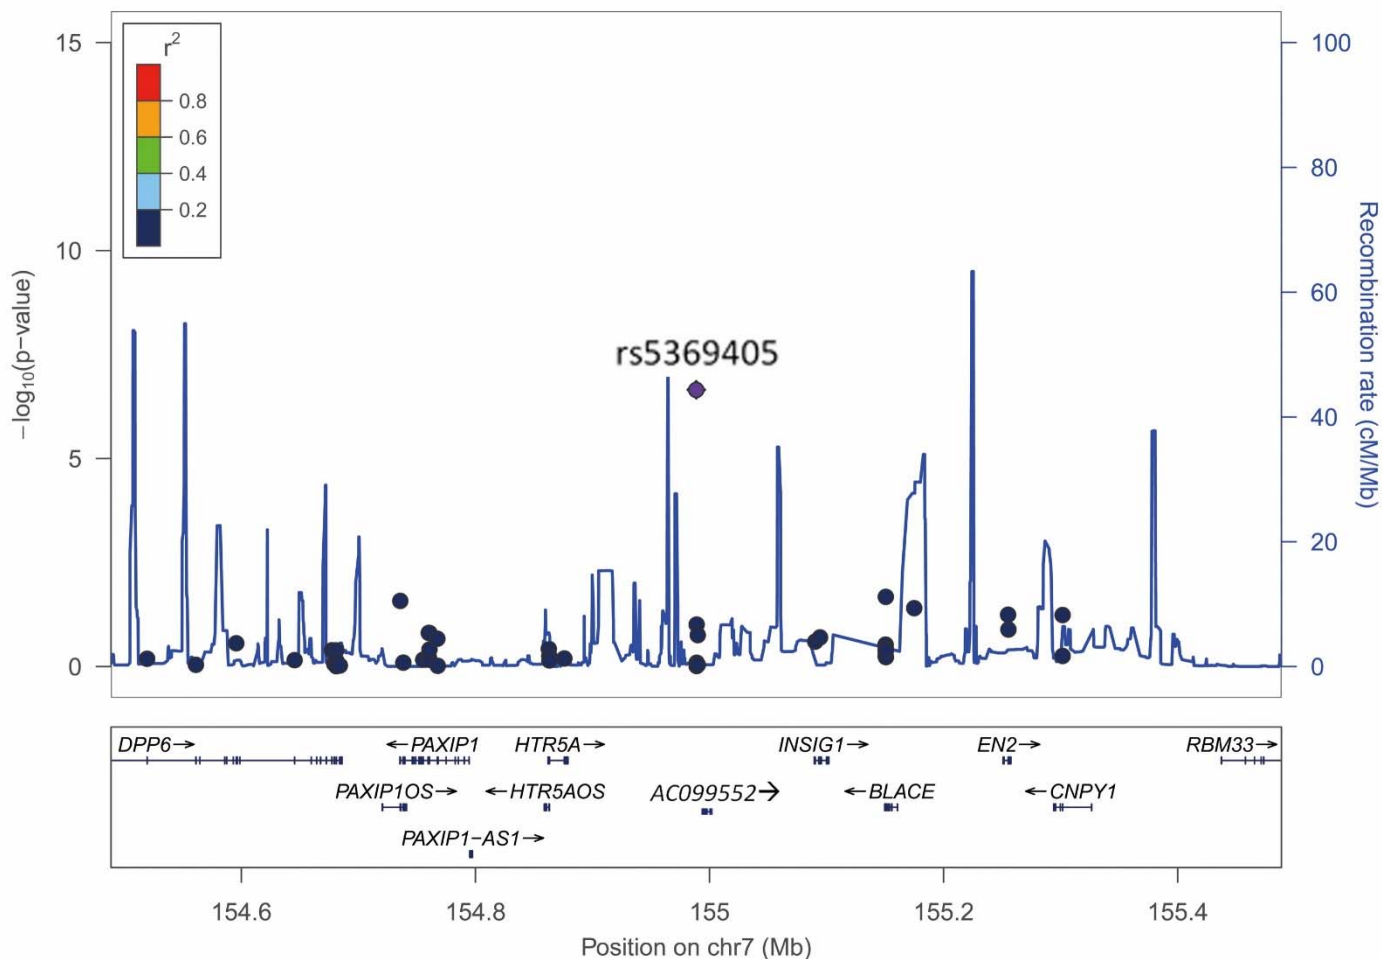

## eReferences

1. Bennett DA, Schneider JA, Arvanitakis Z, Wilson RS. Overview and findings from the religious orders study. *Curr Alzheimer Res.* 2012;9(6):628-645.
2. Bennett DA, Schneider JA, Buchman AS, Barnes LL, Boyle PA, Wilson RS. Overview and findings from the rush Memory and Aging Project. *Curr Alzheimer Res.* 2012;9(6):646-663.
3. De Jager PL, Ma Y, McCabe C, et al. A multi-omic atlas of the human frontal cortex for aging and Alzheimer's disease research. *Sci Data.* 2018;5:180142.
4. Mostafavi S, Gaiteri C, Sullivan SE, et al. A molecular network of the aging human brain provides insights into the pathology and cognitive decline of Alzheimer's disease. *Nat Neurosci.* 2018;21(6):811-819.
5. Wilson RS, Boyle PA, Yu L, et al. Temporal course and pathologic basis of unawareness of memory loss in dementia. *Neurology.* 2015;85(11):984-991.
